# Supplementary material for: MRCKα Is Dispensable for Breast Cancer Development in the MMTV-PyMT Model
Source: MDPI journal article supplement (doi:10.3390/cells10040942), 2021-04-19
Supplement: s1 [file s1]

**Suppl. Table 1. Top 20 genes up-regulated in MDA231 MRCK $\alpha$  KO cells**

| <b>Symbol</b>       | <b>Log2 FC</b> | <b>Protein name</b>                                           |
|---------------------|----------------|---------------------------------------------------------------|
| <b>TLL2</b>         | 4.58           | tolloid like 2                                                |
| <b>FAM221B</b>      | 3.53           | family with sequence similarity 221 member B                  |
| <b>LYPD6B</b>       | 3.40           | LY6/PLAUR domain containing 6B                                |
| <b>LOC101927262</b> | 3.28           | melanoma-associated antigen C1-like                           |
| <b>UNC5B</b>        | 3.17           | unc-5 netrin receptor B                                       |
| <b>AADAC</b>        | 3.09           | arylacetamide deacetylase                                     |
| <b>SIX3</b>         | 2.93           | SIX homeobox 3                                                |
| <b>MTAP</b>         | 2.86           | methylthioadenosine phosphorylase                             |
| <b>LTB</b>          | 2.83           | lymphotoxin beta                                              |
| <b>TEX19</b>        | 2.81           | testis expressed 19                                           |
| <b>NOD2</b>         | 2.68           | nucleotide binding oligomerization domain containing 2        |
| <b>ZNF396</b>       | 2.61           | zinc finger protein 396                                       |
| <b>SPATA31D4</b>    | 2.58           | SPATA31 subfamily D member 4                                  |
| <b>SPOCK2</b>       | 2.58           | SPARC/osteonectin, cwcv and kazal like domains proteoglycan 2 |
| <b>TNR</b>          | 2.58           | tenascin R                                                    |
| <b>SLC25A18</b>     | 2.43           | solute carrier family 25 member 18                            |
| <b>ENTHD1</b>       | 2.39           | ENTH domain containing 1                                      |
| <b>CCL17</b>        | 2.32           | C-C motif chemokine ligand 17                                 |
| <b>GSX2</b>         | 2.32           | GS homeobox 2                                                 |
| <b>MAFA</b>         | 2.32           | MAF bZIP transcription factor A                               |

**Suppl. Table 2. Top 20 genes down-regulated in MDA231 MRCK $\alpha$  KO cells**

| <b>Symbol</b>       | <b>Log2 FC</b> | <b>Protein name</b>                                  |
|---------------------|----------------|------------------------------------------------------|
| <b>TEX101</b>       | -4.66          | testis expressed 101                                 |
| <b>PRR23C</b>       | -3.54          | proline rich 23C                                     |
| <b>CASP14</b>       | -3.52          | caspase 14                                           |
| <b>PKNOX2</b>       | -3.46          | PBX/knotted 1 homeobox 2                             |
| <b>SSX5</b>         | -3.16          | SSX family member 5                                  |
| <b>OXCT2</b>        | -3.07          | 3-oxoacid CoA-transferase 2                          |
| <b>GOLGA8H</b>      | -3.01          | golgin A8 family member H                            |
| <b>ADARB2</b>       | -3.00          | adenosine deaminase, RNA specific B2 (inactive)      |
| <b>LOC107987477</b> | -2.96          | uncharacterized LOC107987477                         |
| <b>NTSR1</b>        | -2.91          | neurotensin receptor 1                               |
| <b>FANCD2P2</b>     | -2.89          | Fanconi anemia complementation group D2 pseudogene 2 |
| <b>RIMBP3B</b>      | -2.86          | RIMS binding protein 3B                              |
| <b>FNTB</b>         | -2.77          | farnesyltransferase, CAAX box, beta                  |
| <b>ACTG2</b>        | -2.77          | actin, gamma 2, smooth muscle, enteric               |
| <b>LRRC15</b>       | -2.75          | leucine rich repeat containing 15                    |
| <b>ACOT11</b>       | -2.72          | acyl-CoA thioesterase 11                             |
| <b>PYY</b>          | -2.71          | peptide YY                                           |
| <b>ADGRF4</b>       | -2.70          | adhesion G protein-coupled receptor F4               |
| <b>LOC107987253</b> | -2.58          | uncharacterized protein FAM215A-like                 |
| <b>LOC107987254</b> | -2.58          | uncharacterized protein FAM215A-like                 |

**Suppl. Table 3. Top 20 genes up-regulated in MDA231 MRCK $\beta$  KO cells**

| <b>Symbol</b>       | <b>Log2 FC</b> | <b>Protein name</b>                                              |
|---------------------|----------------|------------------------------------------------------------------|
| <b>LMOD1</b>        | 3.70           | leiomodin 1                                                      |
| <b>TLL2</b>         | 3.46           | tolloid like 2                                                   |
| <b>SLFN11</b>       | 2.81           | schlafen family member 11                                        |
| <b>LOC107984156</b> | 2.75           | ADP-ribosylation factor-like protein 17                          |
| <b>SYT7</b>         | 2.58           | synaptotagmin 7                                                  |
| <b>COL11A2</b>      | 2.58           | collagen type XI alpha 2 chain                                   |
| <b>FAM221B</b>      | 2.55           | family with sequence similarity 221 member B                     |
| <b>ZNF382</b>       | 2.53           | zinc finger protein 382                                          |
| <b>LTB</b>          | 2.50           | lymphotoxin beta                                                 |
| <b>AADAC</b>        | 2.46           | arylacetamide deacetylase                                        |
| <b>NIPSNAP3B</b>    | 2.46           | nipsnap homolog 3B                                               |
| <b>DENND6B</b>      | 2.32           | DENN domain containing 6B                                        |
| <b>FAM167B</b>      | 2.32           | family with sequence similarity 167 member B                     |
| <b>BTBD8</b>        | 2.31           | BTB domain containing 8                                          |
| <b>SKAP1</b>        | 2.31           | src kinase associated phosphoprotein 1                           |
| <b>INSC</b>         | 2.28           | inscuteable homolog (Drosophila)                                 |
| <b>TRPM2</b>        | 2.24           | transient receptor potential cation channel subfamily M member 2 |
| <b>AGT</b>          | 2.18           | angiotensinogen                                                  |
| <b>PPP1R32</b>      | 2.14           | protein phosphatase 1 regulatory subunit 32                      |
| <b>PIK3IP1</b>      | 2.12           | phosphoinositide-3-kinase interacting protein 1                  |

**Suppl. Table 4. Top 20 genes down-regulated in MDA231 MRCK $\beta$  KO cells**

| <b>Symbol</b>       | <b>Log2 FC</b> | <b>Protein name</b>                                         |
|---------------------|----------------|-------------------------------------------------------------|
| <b>SSX5</b>         | -3.30          | SSX family member 5                                         |
| <b>CYBB</b>         | -3.21          | cytochrome b-245 beta chain                                 |
| <b>NR5A2</b>        | -3.04          | nuclear receptor subfamily 5 group A member 2               |
| <b>CTSW</b>         | -2.97          | cathepsin W                                                 |
| <b>PRY</b>          | -2.91          | PTPN13-like, Y-linked                                       |
| <b>TMEM233</b>      | -2.84          | transmembrane protein 233                                   |
| <b>UPK1B</b>        | -2.83          | uroplakin 1B                                                |
| <b>C9orf66</b>      | -2.75          | chromosome 9 open reading frame 66                          |
| <b>EME2</b>         | -2.75          | essential meiotic structure-specific endonuclease subunit 2 |
| <b>ADGRF4</b>       | -2.70          | adhesion G protein-coupled receptor F4                      |
| <b>LOC105379282</b> | -2.70          | glucose-dependent insulinotropic receptor-like              |
| <b>LOC100130357</b> | -2.70          | uncharacterized LOC100130357                                |
| <b>IL10</b>         | -2.62          | interleukin 10                                              |
| <b>PROCA1</b>       | -2.60          | protein interacting with cyclin A1                          |
| <b>SMKR1</b>        | -2.60          | small lysine rich protein 1                                 |
| <b>GLIPR1L1</b>     | -2.56          | GLI pathogenesis related 1 like 1                           |
| <b>PIANP</b>        | -2.54          | PILR alpha associated neural protein                        |
| <b>TRIM17</b>       | -2.54          | tripartite motif containing 17                              |
| <b>BTC</b>          | -2.50          | betacellulin                                                |
| <b>RNF43</b>        | -2.50          | ring finger protein 43                                      |

**Suppl. Table 5. Top 20 genes up-regulated in MDA231 DKO cells**

| <b>Symbol</b>    | <b>Log2 FC</b> | <b>Protein name</b>                                              |
|------------------|----------------|------------------------------------------------------------------|
| <b>LTB</b>       | 3.63           | lymphotoxin beta                                                 |
| <b>FAM221B</b>   | 2.97           | family with sequence similarity 221 member B                     |
| <b>EGR1</b>      | 2.49           | early growth response 1                                          |
| <b>SYT7</b>      | 2.35           | synaptotagmin 7                                                  |
| <b>ARC</b>       | 2.30           | activity regulated cytoskeleton associated protein               |
| <b>ALOXE3</b>    | 2.11           | arachidonate lipoxygenase 3                                      |
| <b>NIPSNAP3B</b> | 2.09           | nipsnap homolog 3B                                               |
| <b>SLC12A5</b>   | 2.09           | solute carrier family 12 member 5                                |
| <b>SLC25A18</b>  | 2.07           | solute carrier family 25 member 18                               |
| <b>C5orf64</b>   | 2.04           | chromosome 5 open reading frame 64                               |
| <b>CALCRL</b>    | 2.00           | calcitonin receptor like receptor                                |
| <b>GCNT4</b>     | 1.93           | glucosaminyl (N-acetyl) transferase 4, core 2                    |
| <b>LTF</b>       | 1.90           | lactotransferrin                                                 |
| <b>TRPM2</b>     | 1.90           | transient receptor potential cation channel subfamily M member 2 |
| <b>CXCL11</b>    | 1.81           | C-X-C motif chemokine ligand 11                                  |
| <b>MUSTN1</b>    | 1.75           | musculoskeletal, embryonic nuclear protein 1                     |
| <b>TNFAIP3</b>   | 1.73           | TNF alpha induced protein 3                                      |
| <b>TRPM6</b>     | 1.72           | transient receptor potential cation channel subfamily M member 6 |
| <b>DHRS2</b>     | 1.70           | dehydrogenase/reductase 2                                        |
| <b>CSF2RB</b>    | 1.67           | colony stimulating factor 2 receptor beta common subunit         |

**Suppl. Table 6. Top 20 genes down-regulated in MDA231 DKO cells**

| <b>Symbol</b>   | <b>Log2 FC</b> | <b>Protein name</b>                            |
|-----------------|----------------|------------------------------------------------|
| <b>NR5A2</b>    | -2.72          | nuclear receptor subfamily 5 group A member 2  |
| <b>PYY</b>      | -2.56          | peptide YY                                     |
| <b>RUNDC3A</b>  | -2.32          | RUN domain containing 3A                       |
| <b>GNAT1</b>    | -2.28          | G protein subunit alpha transducin 1           |
| <b>CRLF2</b>    | -2.15          | cytokine receptor-like factor 2                |
| <b>GDPGP1</b>   | -2.13          | GDP-D-glucose phosphorylase 1                  |
| <b>C9orf66</b>  | -2.11          | chromosome 9 open reading frame 66             |
| <b>GHR</b>      | -2.07          | growth hormone receptor                        |
| <b>KIAA2012</b> | -1.95          | KIAA2012                                       |
| <b>PRY</b>      | -1.91          | PTPN13-like, Y-linked                          |
| <b>PCSK6</b>    | -1.91          | proprotein convertase subtilisin/kexin type 6  |
| <b>AMER3</b>    | -1.87          | APC membrane recruitment protein 3             |
| <b>GNRH1</b>    | -1.83          | gonadotropin releasing hormone 1               |
| <b>MYO15B</b>   | -1.78          | myosin XVB                                     |
| <b>ZNF474</b>   | -1.77          | zinc finger protein 474                        |
| <b>TMEM37</b>   | -1.75          | transmembrane protein 37                       |
| <b>SSX5</b>     | -1.74          | SSX family member 5                            |
| <b>CRLF1</b>    | -1.68          | cytokine receptor like factor 1                |
| <b>HLA-G</b>    | -1.64          | major histocompatibility complex, class I, G   |
| <b>HIGD1B</b>   | -1.62          | HIG1 hypoxia inducible domain family member 1B |
