# Supplementary figures and images for: MRCKα Is Dispensable for Breast Cancer Development in the MMTV-PyMT Model
Source: MDPI journal article supplement (doi:10.3390/cells10040942), 2021-04-19

Supplementary Figure 2

a

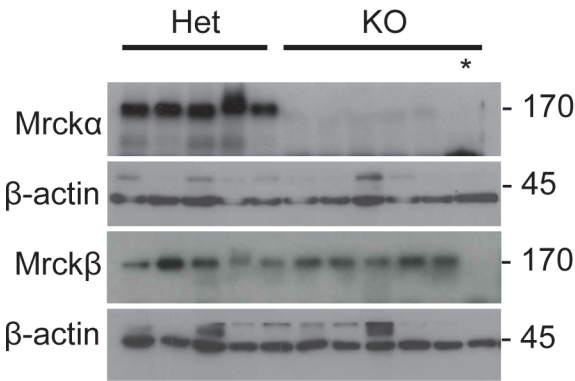

b

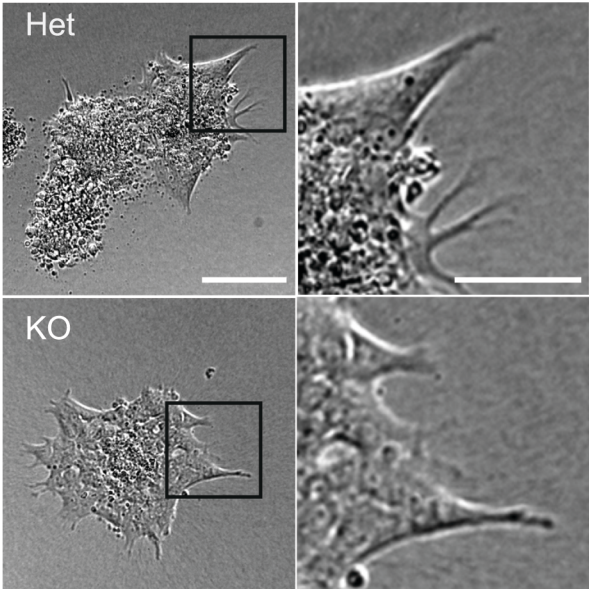

Supplement: s1 [file s1]

Supplementary Figure 4

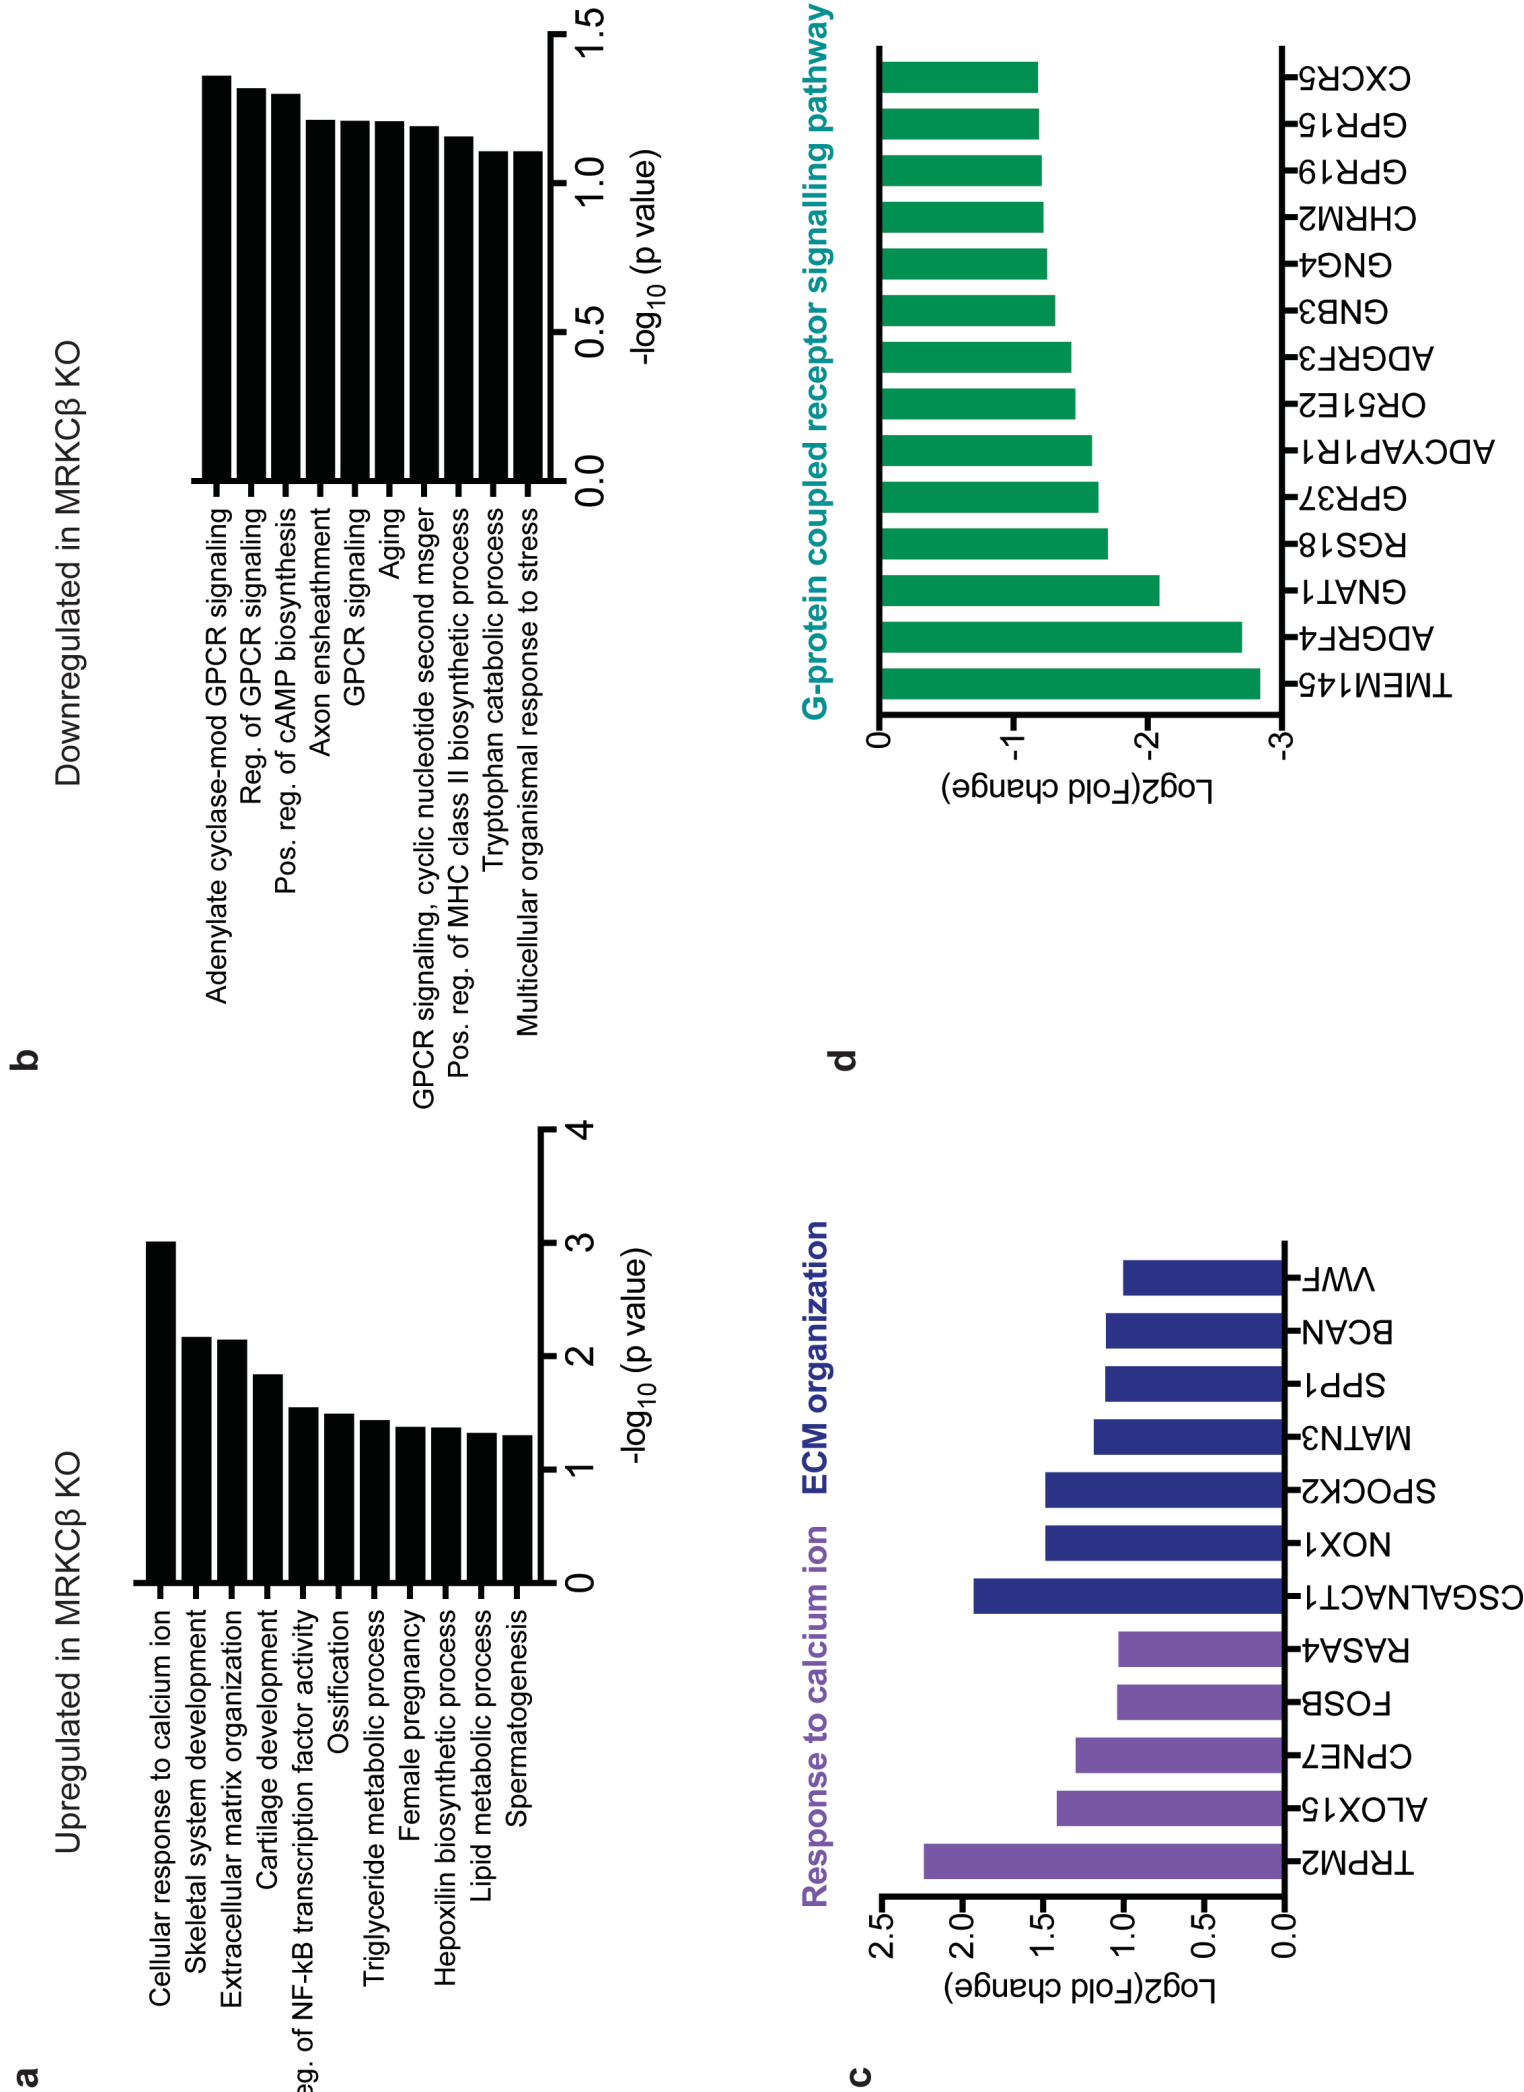

Supplement: s1 [file s1]

# Supp. Figure S1

a

MRCK $\beta$  mRNA

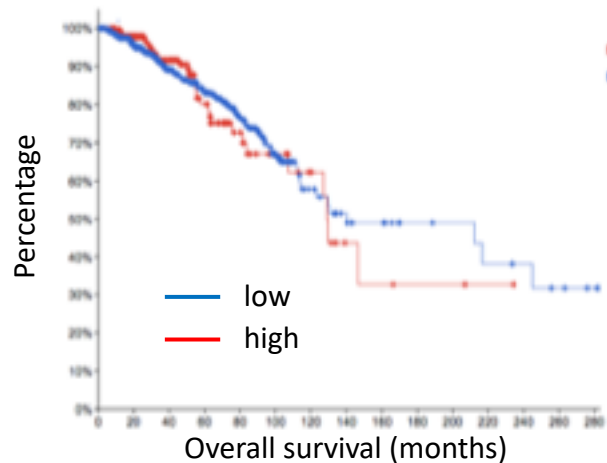

b

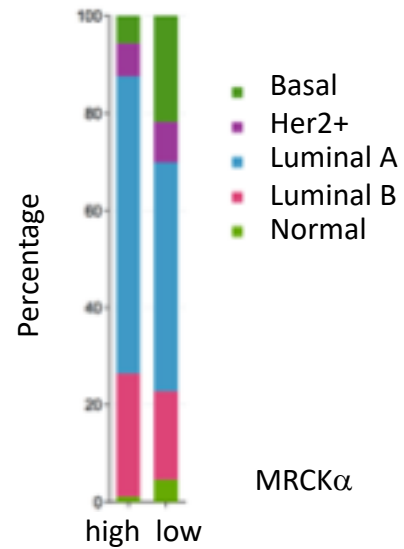

Supplement: s1 [file s1]

Supplementary Figure 6

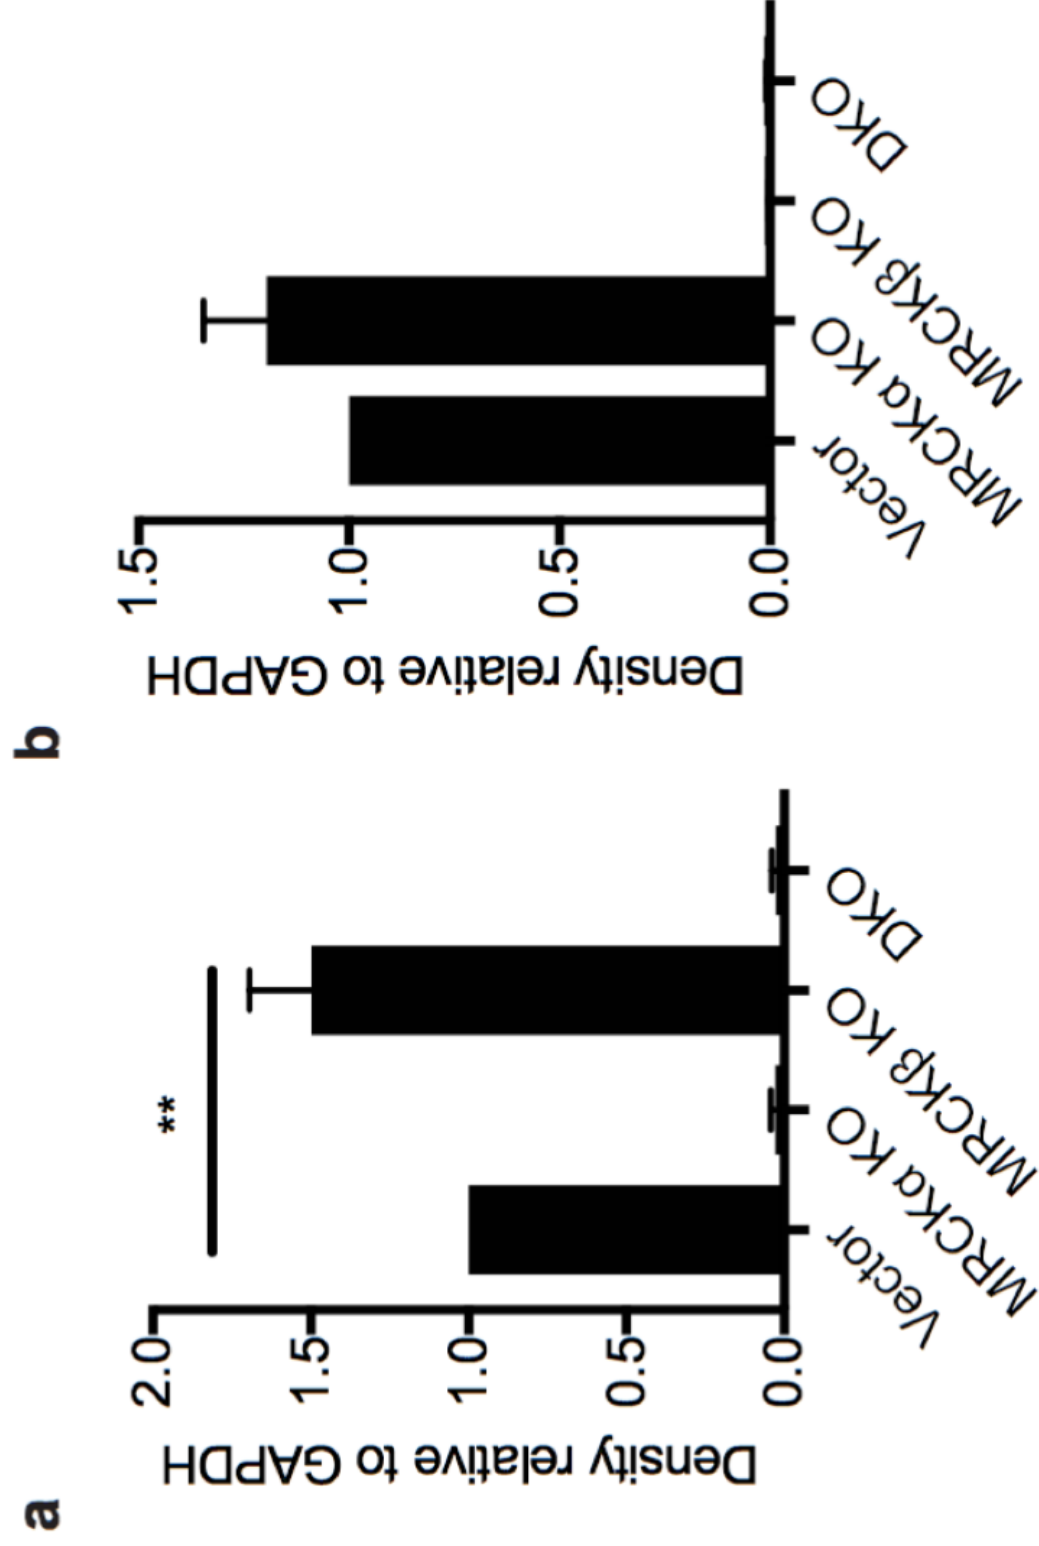

Supplement: s1 [file s1]

Supplementary Figure 5

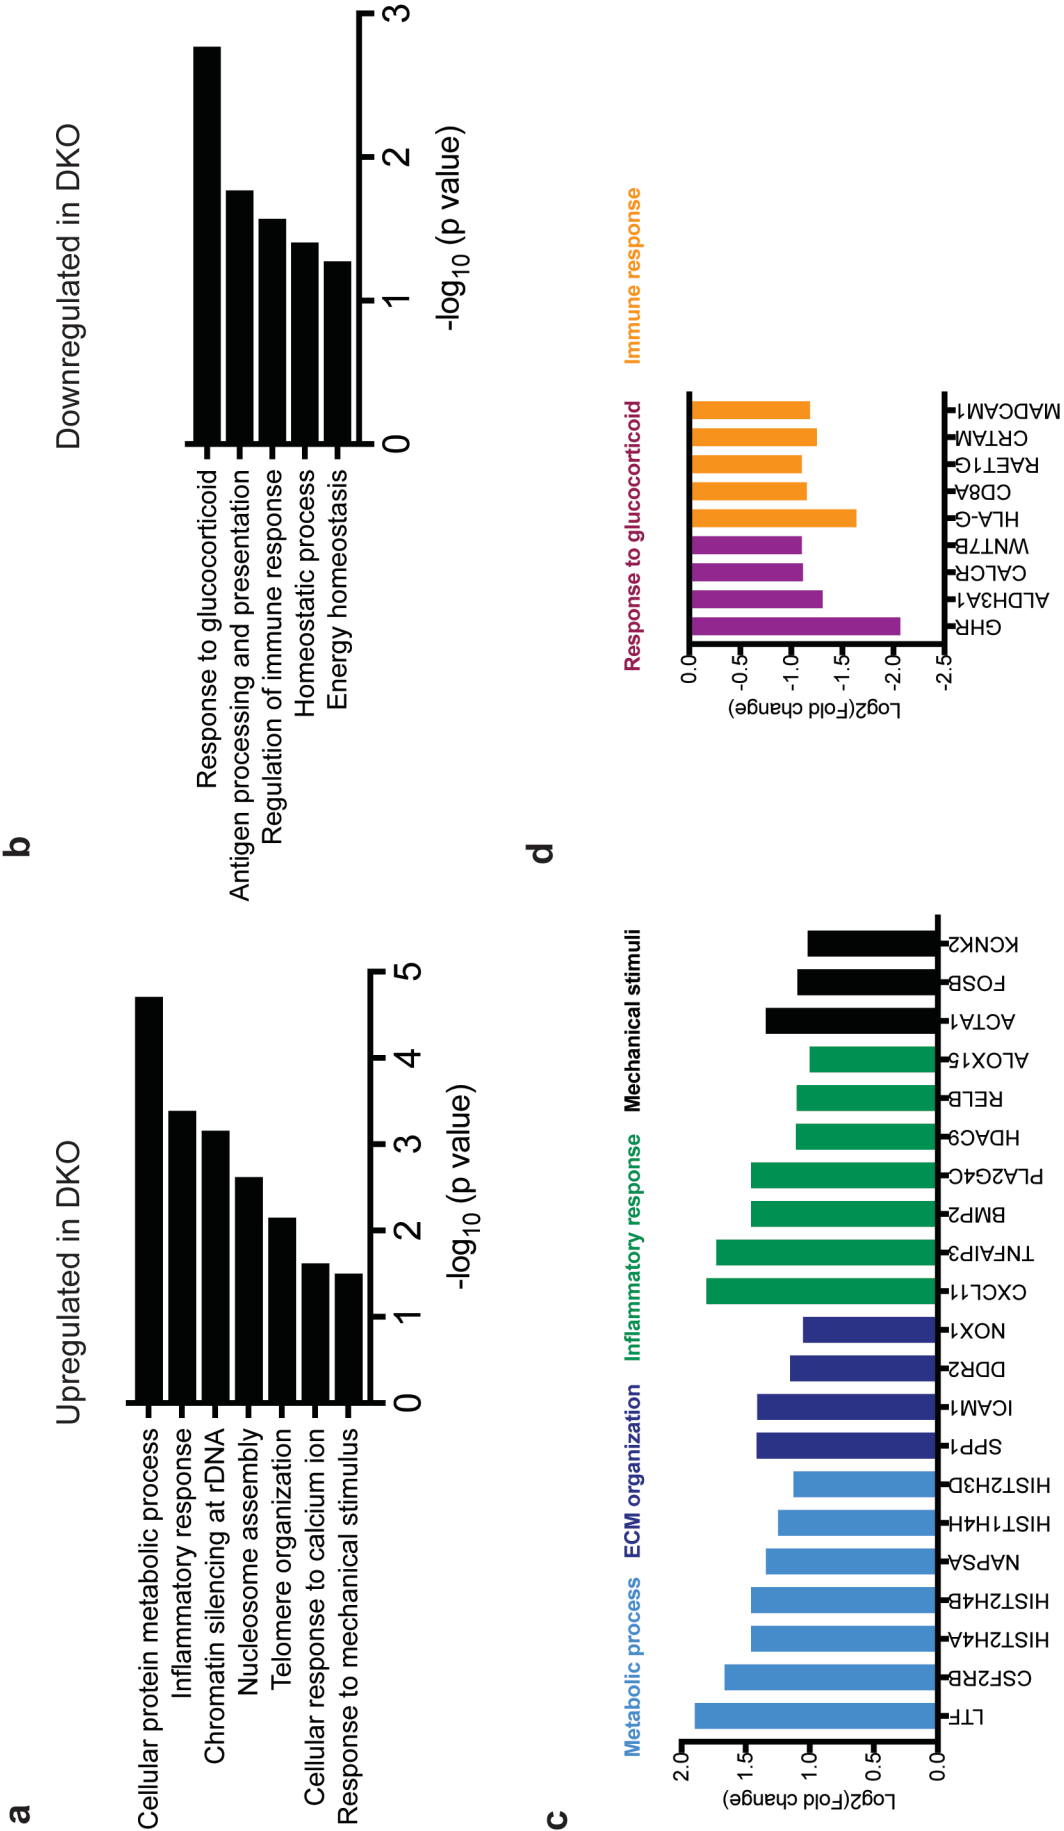

Supplement: s1 [file s1]

Supplementary Figure 3

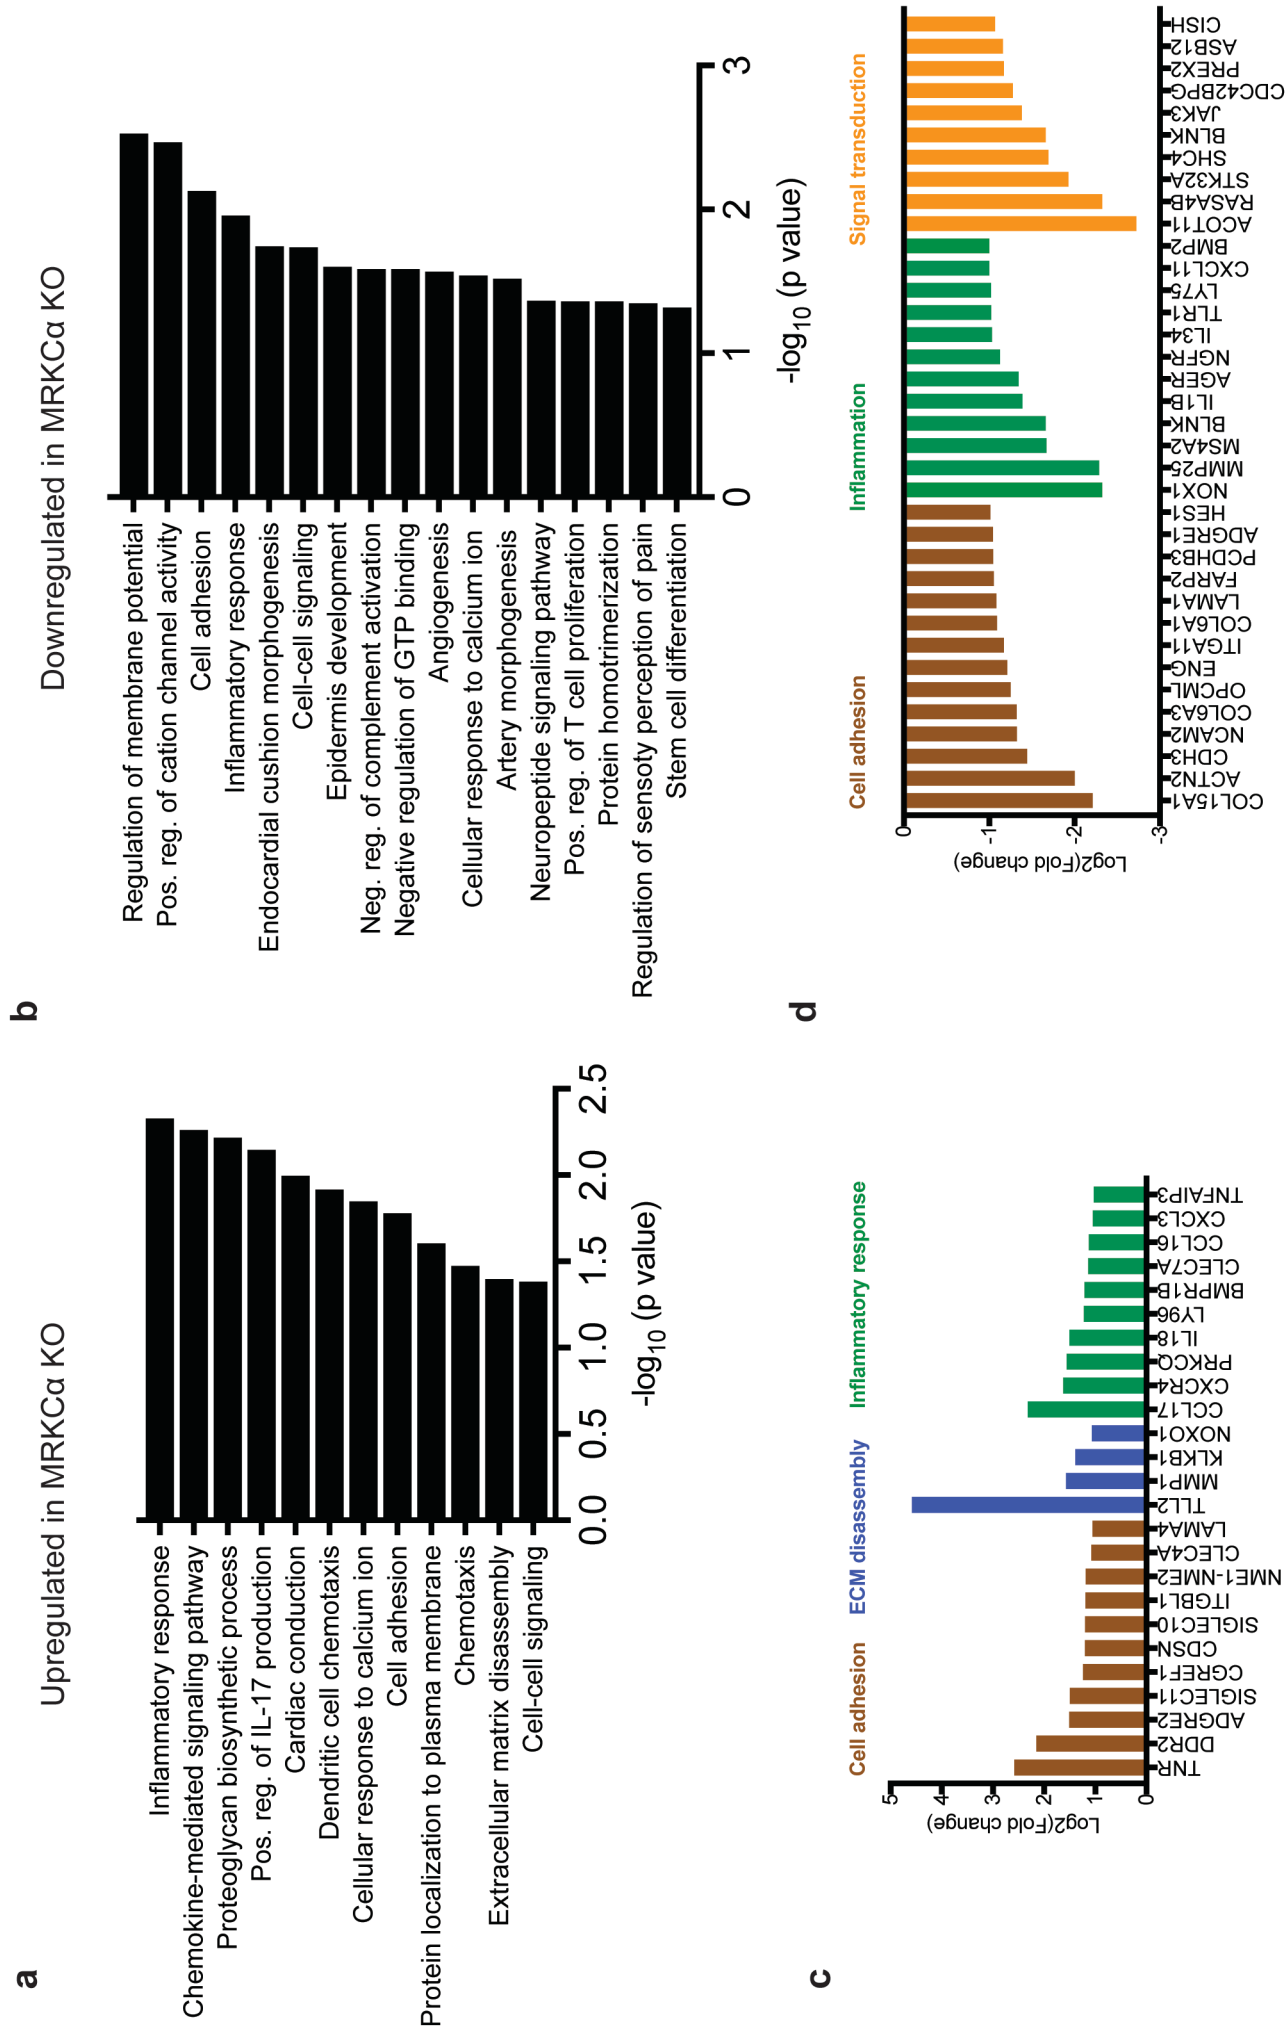

Supplement: s1 [file s1]
